# Supplementary material for: Green Trade and Globalization as Drivers of Sustainable Development in Emerging Economies
Source: Research Square preprint supplement (doi:10.21203/rs.3.rs-7569337/v1), 2025-11-21
Supplement: Supplementary file 1 [file 087c8e7394a8275b194064d8.docx]

**APPENDIX**

APPENDIX 1. List of countries (27)

| **No.** | **Countries** | **No.** | **Countries** |
| --- | --- | --- | --- |
| 1 | Argentina | 15 | Mauritius |
| 2 | Bangladesh | 16 | Mexico |
| 3 | Chile | 17 | Morocco |
| 4 | China | 18 | Nigeria |
| 5 | Colombia | 19 | Pakistan |
| 6 | Czech Republic | 20 | Peru |
| 7 | Egypt | 21 | Philippines |
| 8 | Greece | 22 | Poland |
| 9 | Hungary | 23 | Russia |
| 10 | India | 24 | South Africa |
| 11 | Indonesia | 25 | Thailand |
| 12 | Iran | 26 | Ukraine |
| 13 | Israel | 27 | Vietnam |
| 14 | Malaysia |  |  |

APPENDIX 2. Variable description and source

| **Symbol** | **Definition** | **Measurement** | **Unit** | **Source** |
| --- | --- | --- | --- | --- |
| SDI | Sustainable Development Index | a scale of 0 to 1 | Index | Hickel (2020) |
| SDGI | SDG Index | a scale of 0 to 100 | Index | Sachs et al. (2023) |
| GRT | Green trade | Comparative advantage in environmental goods | Index | IMF |
| GLOB | Globalization | a scale of 1 to 100 | Index | Gygli et al. (2019) |
| GDPpc | Income | GDP per capita (constant 2015 US$) | USD | WDI |
| FD | Financial Development index | a scale of 0 to 1 | Index | IMF |
| IQ | Level of overall institutional Quality | Average of 6 WGI indices (Control of Corruption, Rule of Law, Voice and Accountability, Political Stability and Absence of Violence, Government Effectiveness, and Regulatory Quality) | Index | WGI |
